# Supplementary material for: The arrow of time of brain signals in cognition: Potential intriguing role of parts of the default mode network
Source: PubMed Central journal article supplement (PMC10473271; doi:10.1162/netn_a_00300), 2023-10-01
Supplement: netn-7-3-966-s001.pdf [file netn-7-3-966-s001.pdf]

Deco, G., Perl, Y. S., de la Fuente, L., Sitt, J. D., Yeo, B. T. T., Tagliazucchi, E., Kringelbach, M. L. (2022). Supporting information for "The arrow of time of brain signals in cognition: potential intriguing role of parts of the default mode network." *Network Neuroscience*. Advance publication. [https://doi.org/10.1162/netn\\_a\\_00300](https://doi.org/10.1162/netn_a_00300)

Supplementary material

## **The arrow of time of brain signals in cognition: Potential intriguing role of parts of the default mode network**

Gustavo Deco<sup>1-4</sup>, Yonatan Sanz Perl<sup>1,5</sup>, Laura de la Fuente<sup>5</sup>, Jacobo D. Sitt<sup>6</sup>, B.T. Thomas Yeo<sup>7</sup>, Enzo Tagliazucchi<sup>5,8</sup> and Morten L. Kringelbach<sup>9-11</sup>

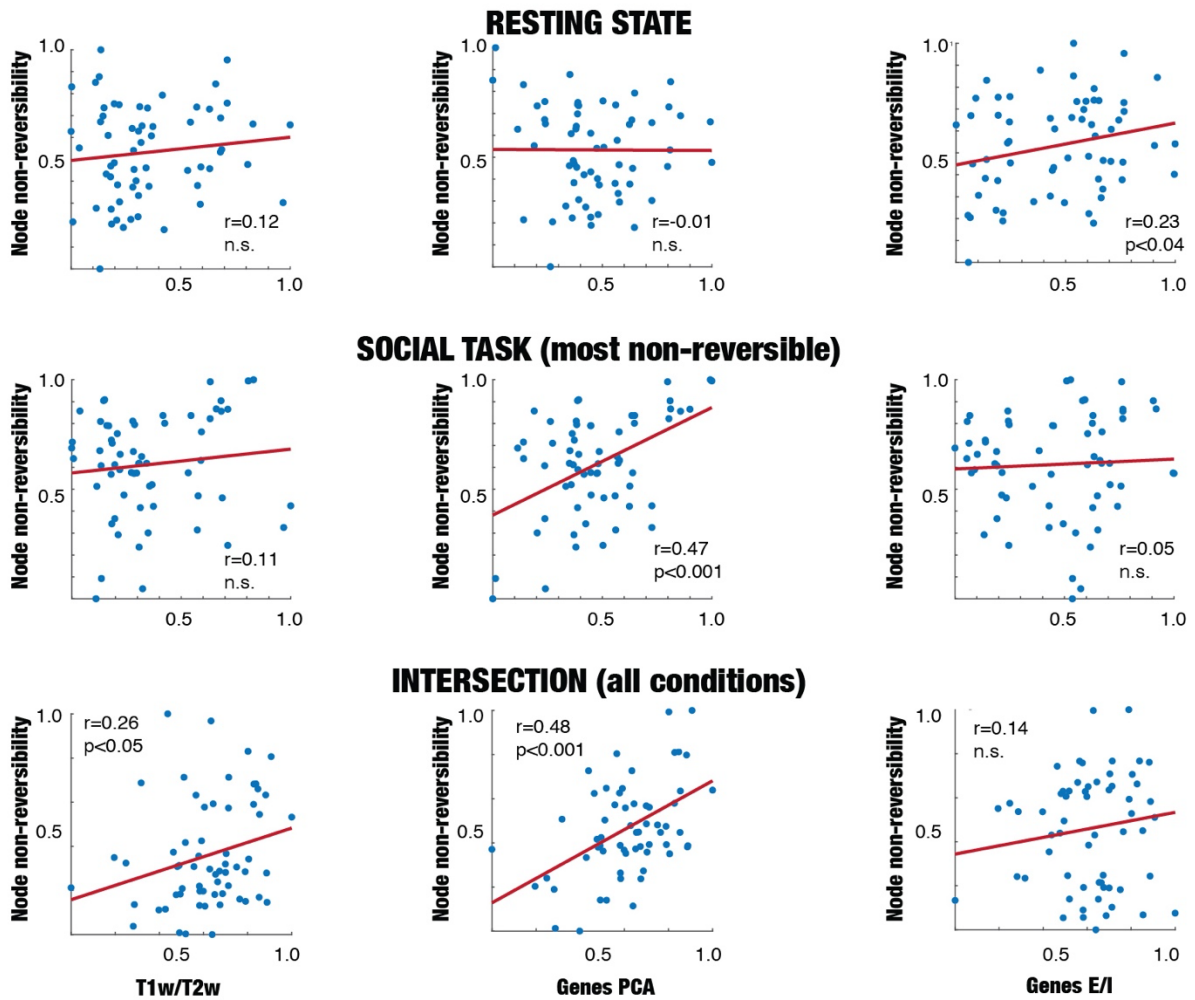

**Figure S1. Hierarchy and heterogeneity at the node-level for resting state, most non-reversible task and intersection of all conditions.** We studied the hierarchy of the mean levels (across participants) of non-reversibility for rest, most non-reversible task and intersection by comparing this to other known sources of heterogeneity such as the myelinisation ratio (*T1w/T2w* ratio, obtained from HCP data) and various forms of gene expressions in the brain, obtained from the Allen Human Brain Atlas (Arnatkeviciute et al., 2019; Deco et al., 2021a; Fornito et al., 2019; Hawrylycz et al., 2012). In particular, we used the first PCA component of all genes and the excitation/inhibition ratio given by the gene-expression for genes coding for the excitatory AMPA and NMDA receptors and inhibitory GABA-A receptor isoforms and subunits. In the resting state condition, we found a significant correlation ( $p < 0.04$ , non-parametric) with the excitation-inhibition ratio but not with the two other measures. In contrast, the SOCIAL task showed a clear significant correlation with the first PCA ( $p < 0.001$ , non-

*parametric) but not with the others. In contrast, we found significant correlations between the intersection of non-reversibility of all conditions with myelin ( $p < 0.05$ , non-parametric) and Genes PCA ( $p < 0.001$ , non-parametric). This bolsters the role of the DMN for orchestrating cognition.*

| <b>Accuracy Training Set</b> |   |      |      |      |
|------------------------------|---|------|------|------|
| Overlap                      | 1 | 89.3 | 92.2 | 90.6 |
|                              | 3 | 94.6 | 95.2 | 95.5 |
|                              | 6 | 96.2 | 95.3 | 92.6 |
|                              |   | 10   | 20   | 30   |

| <b>Accuracy Cross-validation Set</b> |   |      |      |      |
|--------------------------------------|---|------|------|------|
| Overlap                              | 1 | 73.4 | 73.2 | 69.5 |
|                                      | 3 | 78.5 | 77.4 | 74.7 |
|                                      | 6 | 80.3 | 79.9 | 73.4 |
|                                      |   | 10   | 20   | 30   |

| <b>Information Loss Training Set</b> |   |      |      |      |
|--------------------------------------|---|------|------|------|
| Overlap                              | 1 | 0.25 | 0.19 | 0.22 |
|                                      | 3 | 0.13 | 0.12 | 0.12 |
|                                      | 6 | 0.10 | 0.12 | 0.20 |
|                                      |   | 10   | 20   | 30   |

| <b>Information Loss Cross-validation Set</b> |   |      |      |      |
|----------------------------------------------|---|------|------|------|
| Overlap                                      | 1 | 0.65 | 0.73 | 0.77 |
|                                              | 3 | 0.63 | 0.65 | 0.73 |
|                                              | 6 | 0.58 | 0.55 | 0.68 |
|                                              |   | 10   | 20   | 30   |

Window sizes

Window sizes

**Table S1. Example of selection of window size and overlap parameters for the global-level analysis in resting state.** The table shows the Accuracy and Information Loss for the Training set, and the Accuracy and Information Loss for the Cross-validation Set using varying window sizes [10,20,30] and overlaps [1,3,6] (both in TRs).
